# Supplementary material for: Rational surface engineering of MXene@N-doped hollow carbon dual-confined cobalt sulfides/selenides for advanced aluminum batteries
Source: Royal Society of Chemistry journal article supplement (doi:10.1039/d1ta03465k), 2021-01-01
Supplement: d1ta03465k1.pdf [file d1ta03465k1.pdf]

## Supporting information

### Rational Surface Engineering of MXene@N-doping Hollow Carbon Dual-confined Cobalt Sulfides/Selenides for Advanced Aluminum Batteries

Long Yao, Shunlong Ju, Xuebin Yu\*

Department of Materials Science, Fudan University, Shanghai 200433, China  
E-mail: yuxuebin@fudan.edu.cn

## Experimental section

### Synthesis of Delaminated $Ti_3C_2T_x$ MXene

First, 1.0 g of LiF (Sigma Aldrich) was added into 20 mL of 9 M HCl (Sigma Aldrich), and the solution was stirred for 5 min. Then, 1 g of  $Ti_3AlC_2$  MAX phase powder was slowly added to the solution and kept at 35 °C for 24 h under constant stirring. After that, the mixture was washed with deionized water for several times, until the supernatant reached a pH of approximately 6. The precipitates were then ultrasonicated in an ice-bath for 2 h. Finally, the supernatant was collected by centrifugation at 3500 rpm for 1h.

### Preparation of ZIF-67@MXene and ZIF-67 Precursor

The ZIF-67@MXene composite was prepared by the coprecipitation. In detail, 5 mL of 0.206 mM cobalt nitrate aqueous solution with 6 mg PVP was sufficiently dissolved into 1 mL of 6 mg  $mL^{-1}$  MXene suspension. Then, 5 ml of 0.824 mM 2-methylimidazole aqueous solution with 200  $\mu$ l triethylamine was added into above solution. After the mixture was incubated at room temperature for 4 h, the resulting purple precipitates were centrifuged and washed with deionized water for several times. To obtain the ZIF-67@MXene sponge-like precursor, the precipitates mixed with 1.5 mL deionized water were freeze dried for 48 h.

### Synthesis of $Co_9S_8$ NP@NPC@MXene and $Co_9S_8$ NP@NPC

The  $Co_9S_8$  NP@NPC@MXene was prepared by a simultaneous thermal-induced carbonization and sulfidation. Typically, ZIF-67@MXene precursor and appropriate S powder were put into a combustion boat and heated at rate of 2 °C/min to 650°C for 2h in flowing  $H_2/Ar$  (5/95, v/v) atmosphere. For comparison,  $Co_9S_8$  NP@NPC composites were prepared through similar heat treatment using ZIF-67 as precursor.

### Synthesis of $CoSe_2$ @NPC@MXene and $CoSe_2$ @NPC

Typically, ZIF-67@MXene precursor and appropriate Se powder were put into a combustion boat and heated at rate of 2 °C/min to 650°C for 2h in flowing  $H_2/Ar$  (5/95, v/v) atmosphere. For comparison,  $CoSe_2$ @NPC composites were prepared through similar heat treatment using ZIF-67 as precursor.

### Preparation of the Ionic Liquid Electrolyte

The anhydrous  $AlCl_3$  (99.999+%, Alfa Aesar) was slowly added to the dried 1-ethyl-3-methylimidazolium chloride ([EMIm]Cl, 98%, Alfa Aesar) ionic liquid with a molar ratio of 1.3:1 in an glovebox with  $O_2 < 0.1$ ppm and  $H_2O < 0.1$ ppm.

### Material Characterization

The cobalt ion concentration was confirmed by ICP-MS (PerkinElmer NexION 300X). The crystalline structure of the products was investigated by XRD (Bruker D8 Advance, Cu  $K\alpha$ ,  $\lambda = 0.151418$  nm) from 5 to 80° with 10°  $min^{-1}$  steps. The morphologies and microstructures were examined by scanning electron microscope (SEM, 6390 and 6700F) and transmission electron microscope (TEM, JEOL 2010). The chemical states of the as-prepared active materials and electrodes after charge and discharge were identified by XPS (Thermo ESCALAB 250Xi, Al  $K\alpha$

( $h\nu = 1486.6$  eV)). The BET specific surface area and pore size distributions were determined by  $N_2$  adsorption-desorption isotherms at 77 K using a Trwastar-3020 instrument.

### Electrochemical Measurement

The working electrodes were fabricated by mixing active materials, conductive carbon black, and the binder of sodium carboxymethyl cellulose at a mass ratio of 7:2:1. The mass loading of active materials in the electrode was around  $0.8\text{-}1.0$   $\text{mg cm}^{-2}$ . The resultant paste was coated on the high pure Mo collector and the electrodes were dried at  $80$  °C under vacuum overnight. The swagelok-type cells were assembled with the high purity Al as the counter electrode, glass fiber (GF/D) as the separators, and as-prepared ionic liquid electrolytes as the electrolyte. The cells were set up in a glovebox filled with  $H_2O < 0.1$  ppm and  $O_2 < 0.1$  ppm. Galvanostatic charge/discharge measurements were carried out on a LAND battery test system (Wuhan, China). CV and EIS were conducted on a CHI 604E electrochemistry workstation.

### Computational Details

The DFT calculation was performed using the Vienna ab initio Simulation Package, which uses the projector-enhanced wave approximation and the Perdew-Burke-Ernzerhof function to describe the exchange-related energy. A 520 eV cut-off value of the plane wave basis set was used to avoid Pulay stress, and the convergence criterion was set to  $10^{-5}$  eV. Allow the position of the atoms to move until the force acting on each atom was  $< 0.02$  eV/Å. The adsorption energy of atomic iodine on the  $3\times 3$   $Ti_3C_2T_x$  MXene supercell was calculated by selecting a k-point of  $3\times 3\times 1$ . Applying a vacuum thickness of  $15$  Å can avoid the interaction between the slab and its periodic images. DFT-D3 correction was also used to account for van der Waals interaction. To evaluate the binding strength of Co on  $Ti_3C_2T_x$  MXene, binding energy ( $E_b$ ) was defined as

$$E_b = E_{\text{Total}} - E_{\text{Co}} - E_{\text{Substrate}}$$

where  $E_{\text{Co}}$  is the energy of single Co atom,  $E_{\text{Total}}$  and  $E_{\text{Substrate}}$  are the calculated total energies of  $Ti_3C_2T_x$  MXene with and without Co adsorbed, respectively. Charge density difference plots are obtained by subtracting the charge densities of pristine  $Ti_3C_2T_x$  and isolated Co atom from that of Co adsorbed  $Ti_3C_2T_x$ . The yellow regions denote areas of charge accumulation while the blue regions denote charge depletion.

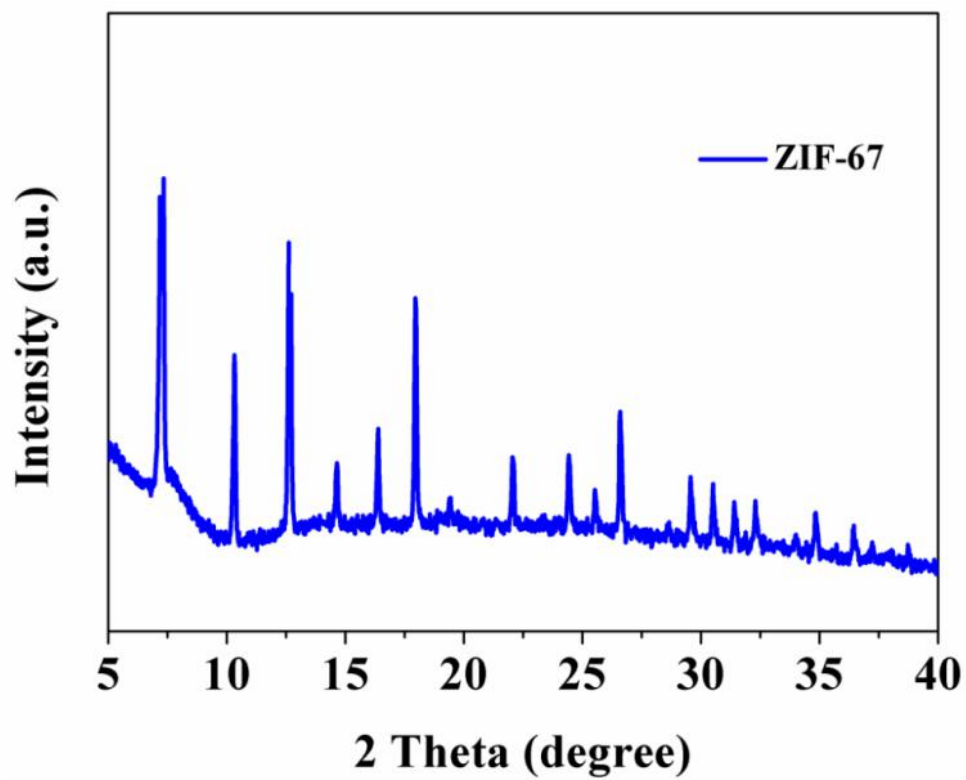

Fig. S1. XRD pattern of ZIF-67.

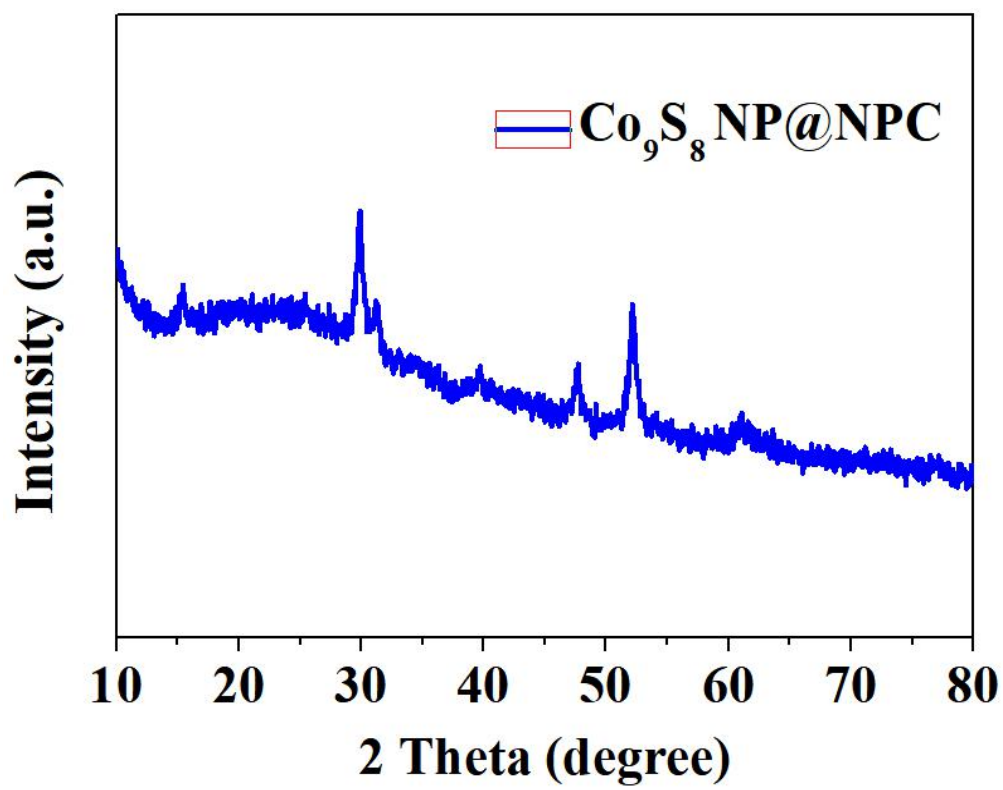

Fig. S2. XRD pattern of  $\text{Co}_9\text{S}_8$  NP@NPC.

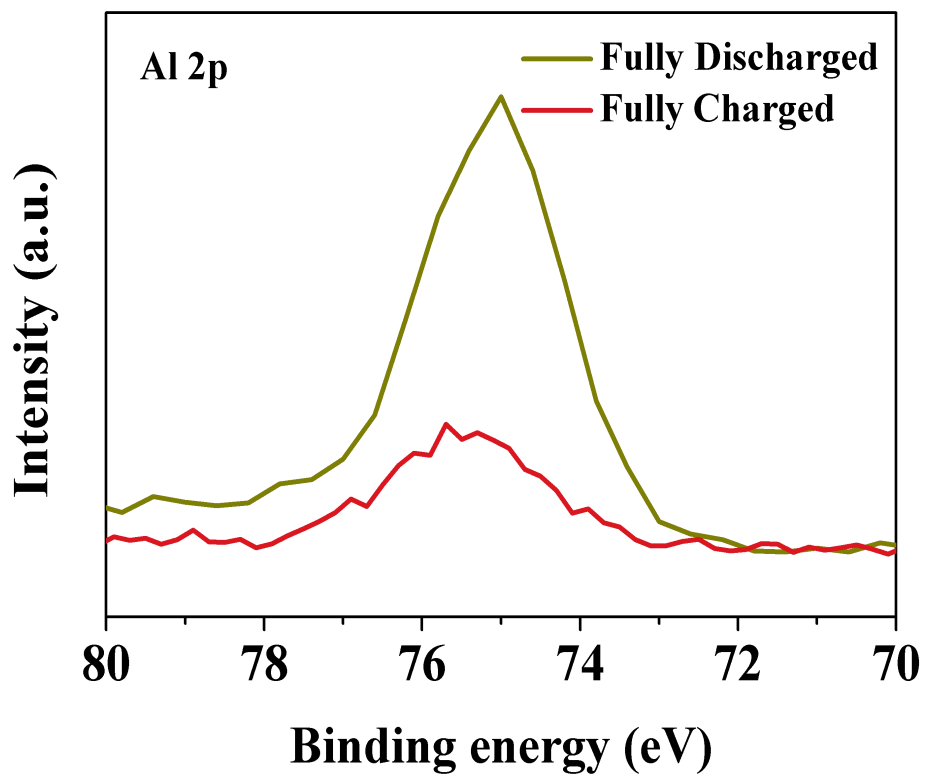

Fig. S3. XPS signals of Al 2p at various electrochemical states for Co<sub>9</sub>S<sub>8</sub> NP@NPC electrode.

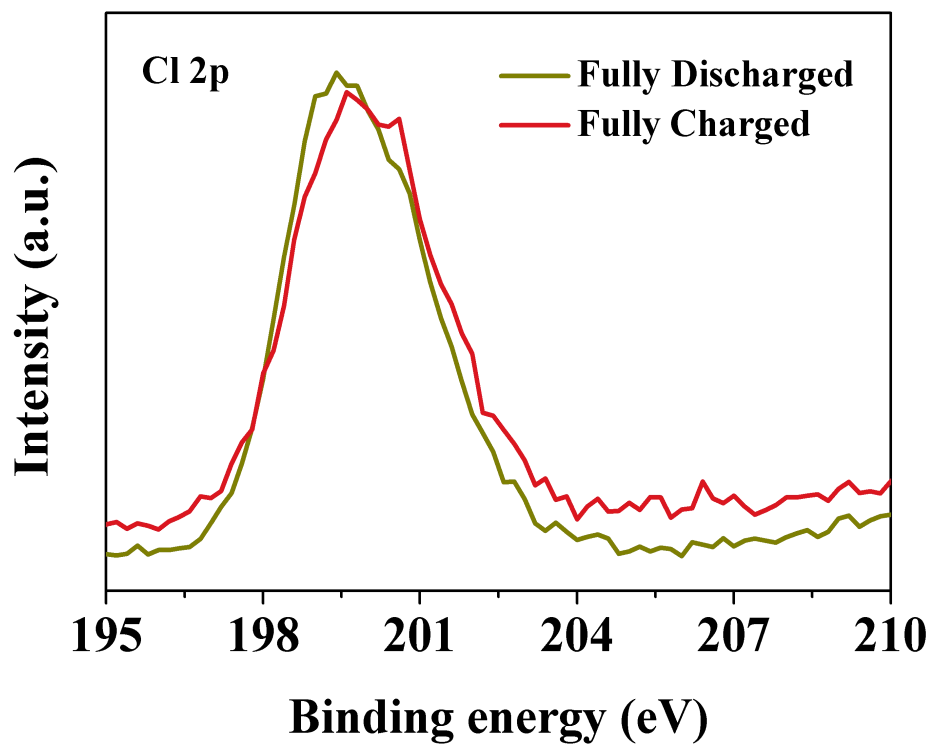

Fig. S4. XPS signals of Cl 2p at various electrochemical states for Co<sub>9</sub>S<sub>8</sub> NP@NPC electrode.

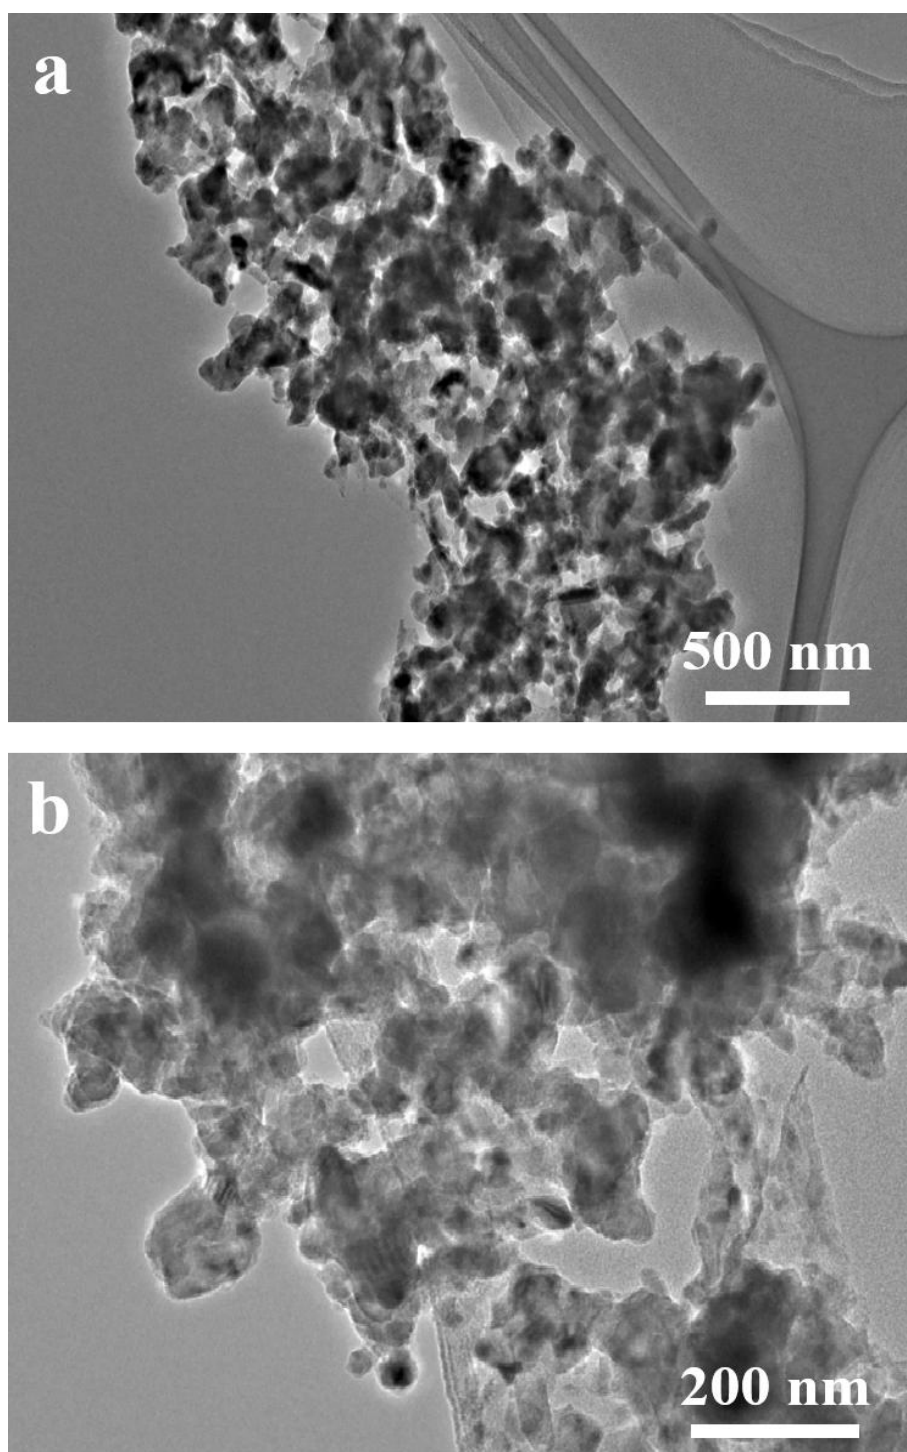

Fig. S5. (a,b) TEM images of the  $\text{Co}_9\text{S}_8$  NP@NPC electrode after 100 cycles under different magnifications.

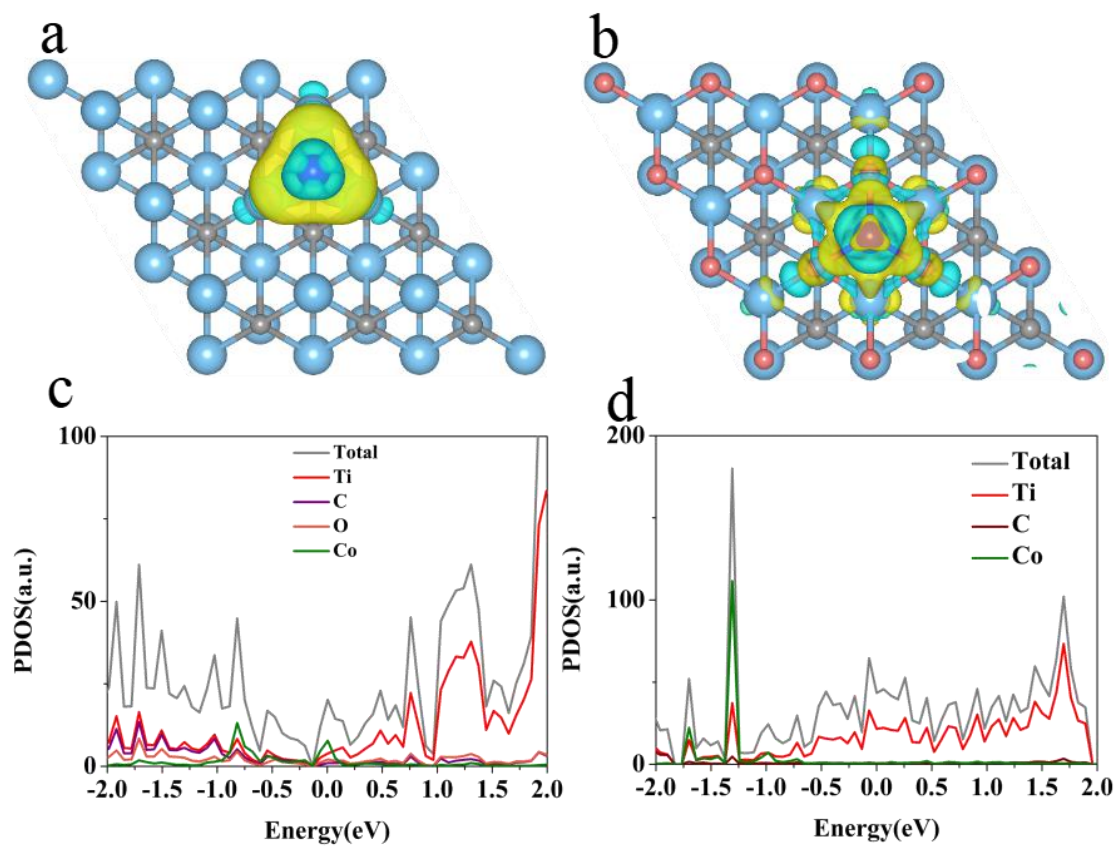

Fig.S6. (a) The charge density difference map calculations for MXene-Co;(b) the charge density difference map calculations for MXene-Co;(c) PDOS plots of MXene and adsorbed Co atom; (d) PDOS plots of MXene-O and adsorbed Co atom.



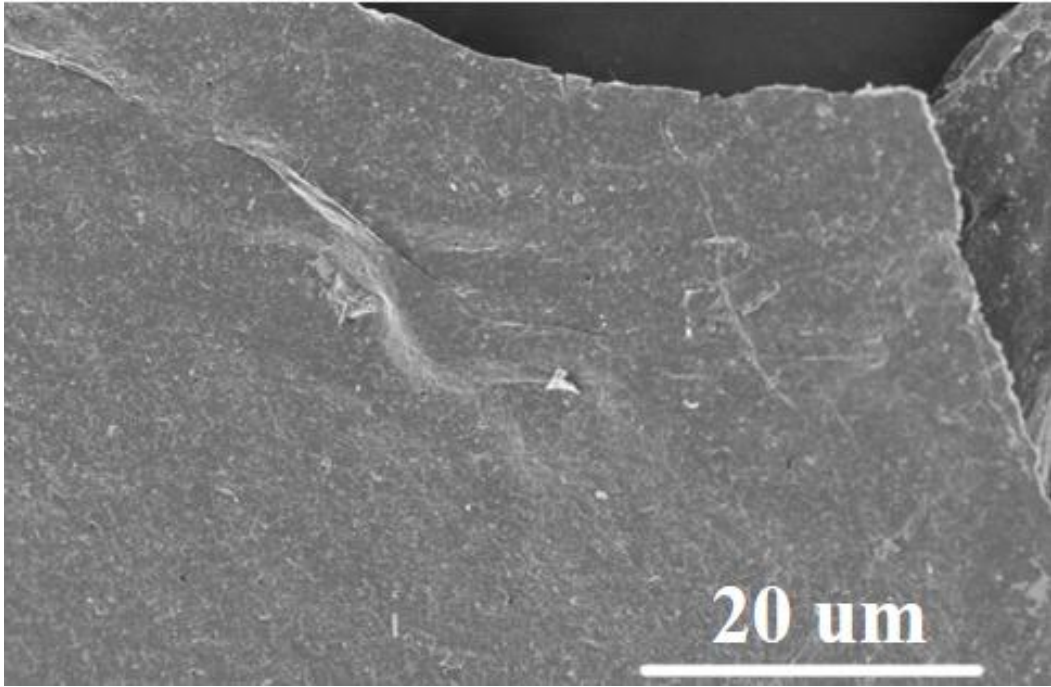

Fig. S7. SEM image of MXene after heat treatment at 600°C.

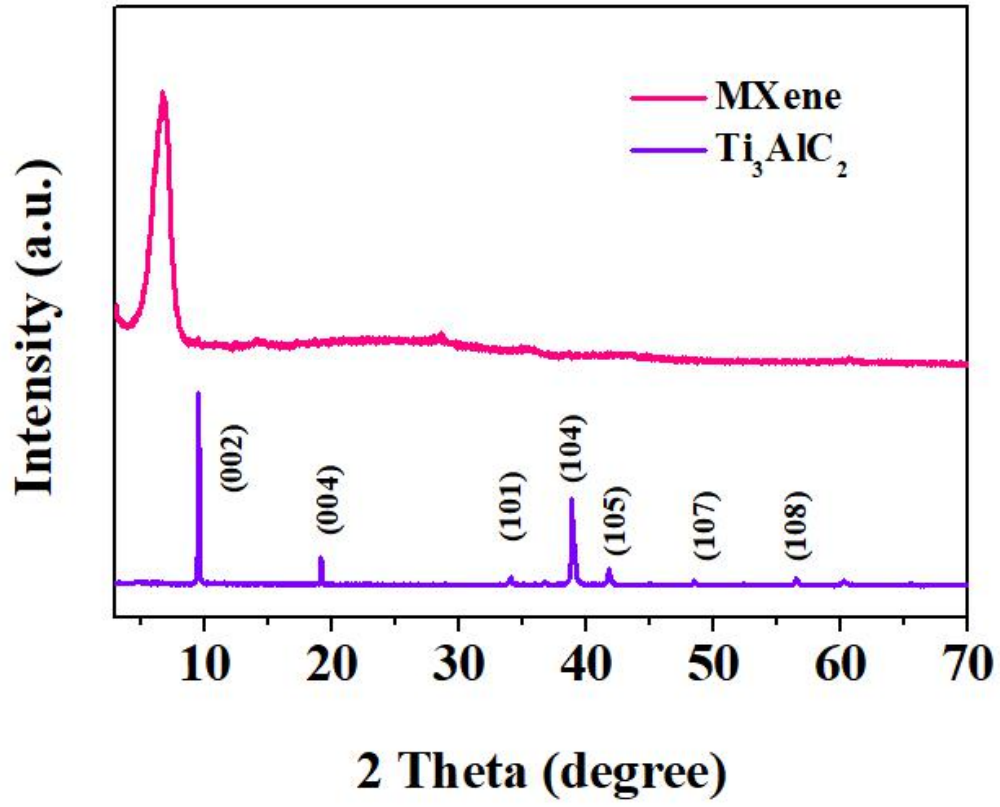

Fig. S8. XRD patterns of delaminated Ti<sub>3</sub>C<sub>2</sub>T<sub>x</sub> MXene and Ti<sub>3</sub>AlC<sub>2</sub>.

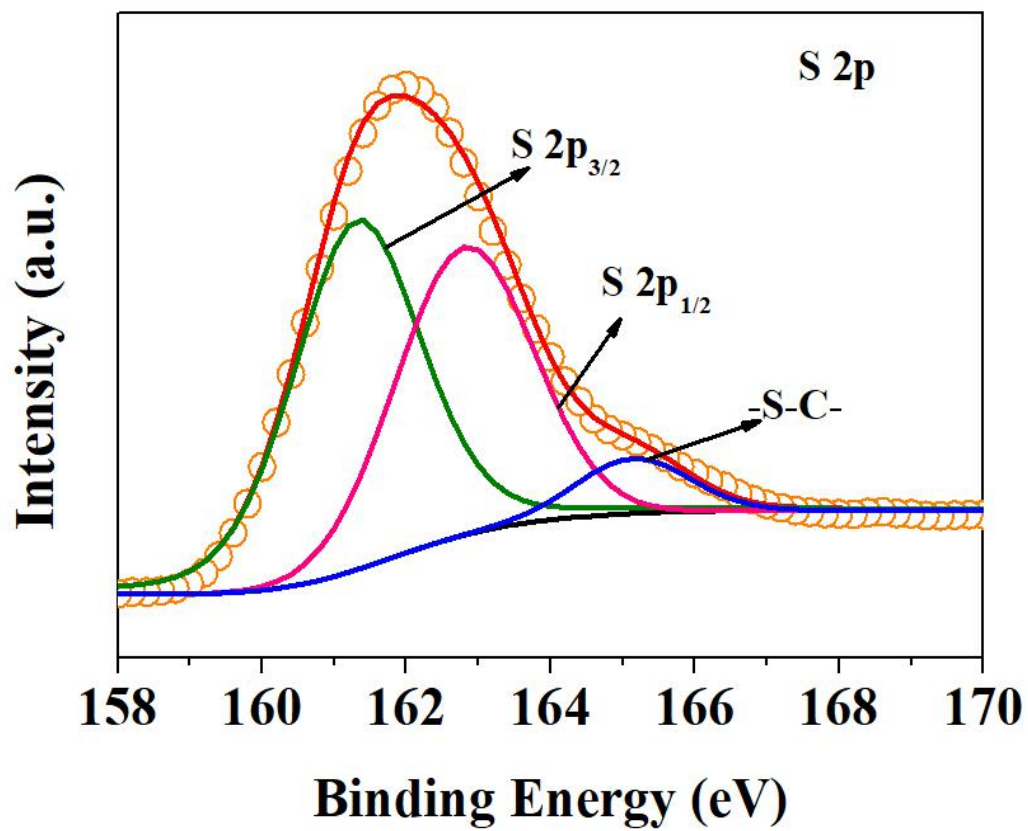

Fig. S9. High-resolution XPS spectra of S 2p for Co<sub>9</sub>S<sub>8</sub> NP@NPC.

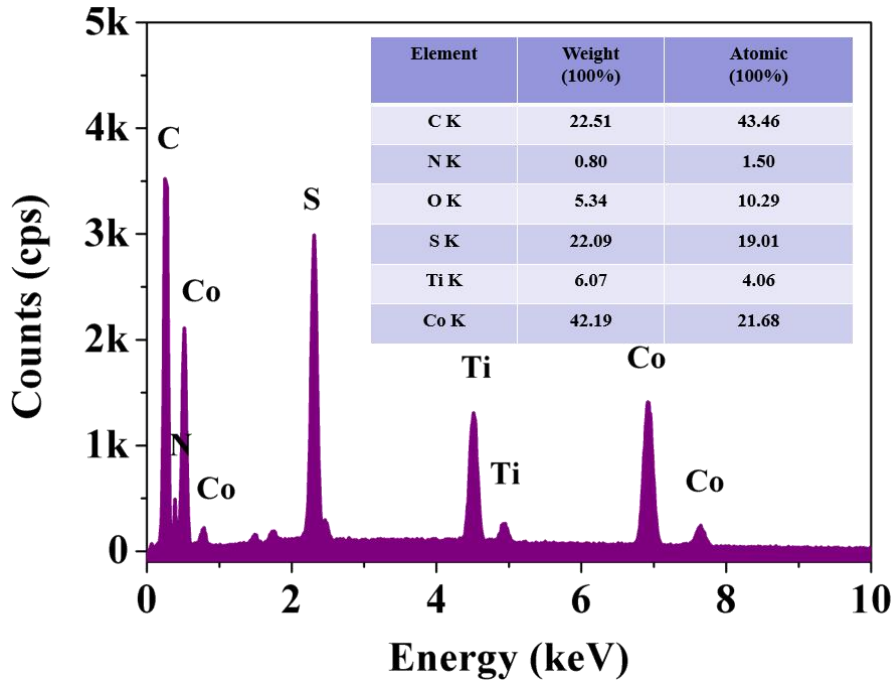

Fig. S10. Elemental analysis results from energy dispersive spectrometer in scanning electron microscopy (SEM-EDS) spectrum of  $\text{Co}_9\text{S}_8$  NP@NPC@MXene.

Based on the atomic percentage of the carbon of MXene ( $\text{Ti}_3\text{C}_2$ ) in the nanocomposite, the weight percentage of carbon of MXene ( $\text{Ti}_3\text{C}_2$ ) could be calculated as follow:

$$\begin{aligned}
 C \text{ wt.\% of } \text{Ti}_3\text{C}_2 &= \frac{\text{molecular weight of C in MXene}}{\text{molecular weight of } \text{Co}_9\text{S}_8 \text{ QD@NPC@MXene}} \\
 &= \frac{12 \times 2}{12 \times 43.46 + 14 \times 1.50 + 16 \times 10.29 + 32 \times 19.01 + 47.87 \times 4.06 + 58.93 \times 21.68} \times 100\% \approx 0.86 \text{ wt.\%}
 \end{aligned}$$

$$\text{Co}_9\text{S}_8 \text{ wt.\%} = (\text{Co} + \text{S}) \text{ wt.\%} = (42.19 + 22.09) \text{ wt.\%} = 64.28 \text{ wt.\%}$$

$$\text{MXene } (\text{Ti}_3\text{C}_2) \text{ wt.\%} = (\text{Ti} + \text{C}) \text{ wt.\%} = (6.07 + 0.86) \text{ wt.\%} = 6.93 \text{ wt.\%}$$

Thus, the carbon content of MXene ( $\text{Ti}_3\text{C}_2$ ) is about 0.86 wt.%. Considering the carbon content of  $\text{Co}_9\text{S}_8$  NP@NPC@MXene is about 22.51 wt.%, the carbon content of  $\text{Co}_9\text{S}_8$  NP@NPC@MXene could be calculated as 21.65 wt.%. In addition, the content of  $\text{Co}_9\text{S}_8$  is about 64.28 wt.% and the MXene is about 6.93 wt.%.

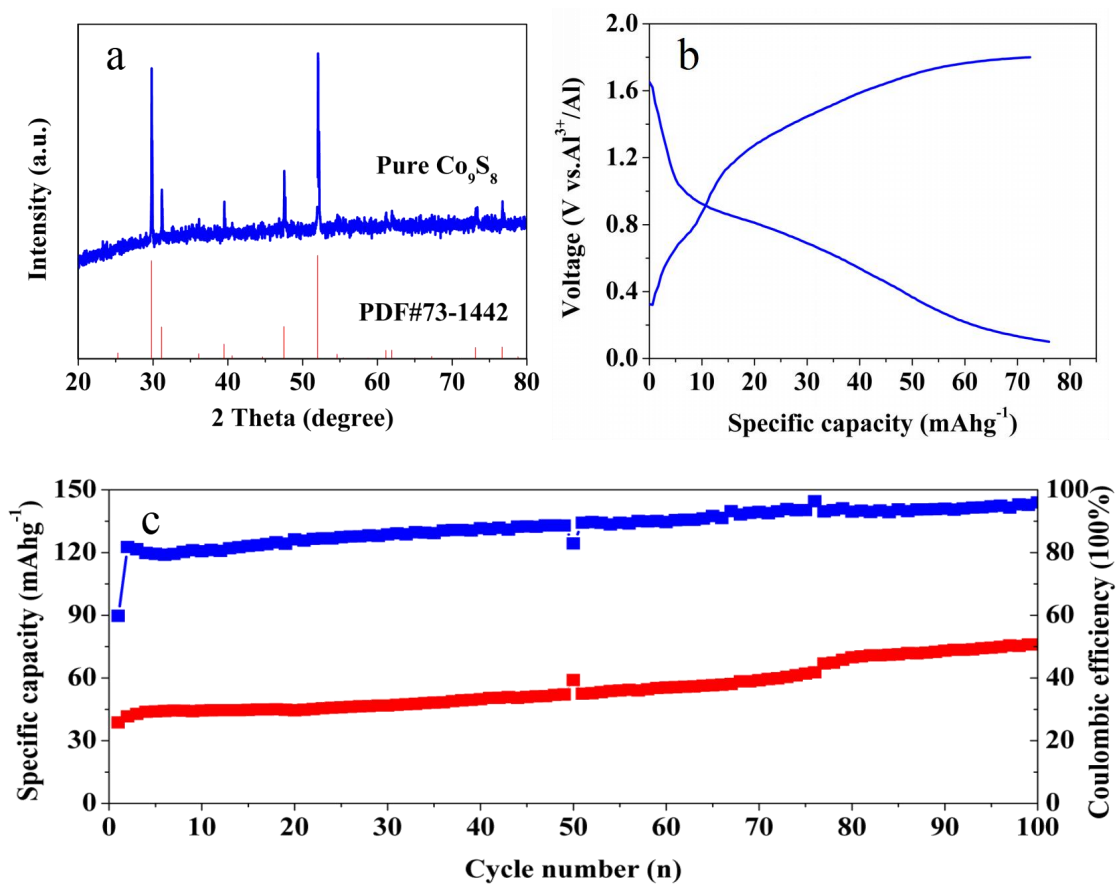

Fig.S11. (a) The XRD patterns of pure  $\text{Co}_9\text{S}_8$  sample; (b) The GCD curve of bare  $\text{Co}_9\text{S}_8$  cathode at  $0.1 \text{ A g}^{-1}$ ; (c) The cycle stability of pure  $\text{Co}_9\text{S}_8$  electrode at  $0.2 \text{ A g}^{-1}$ .

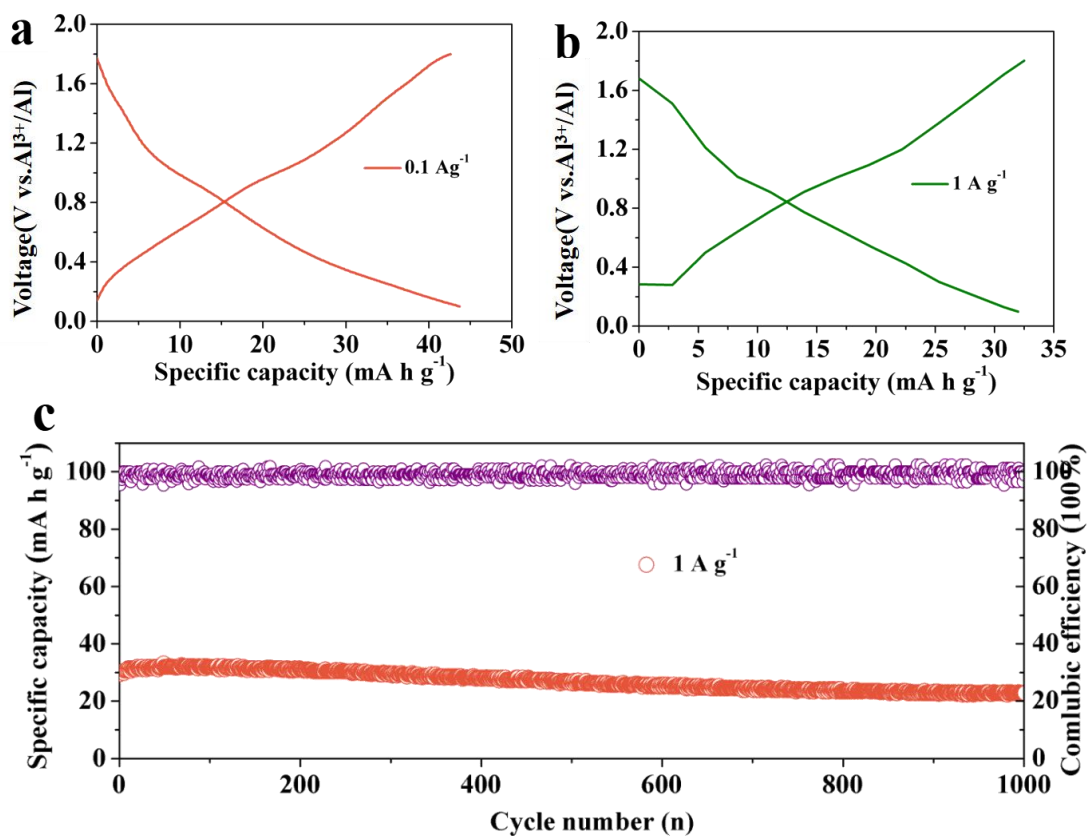

Fig. S12. (a) The GCD curves of MXene at 0.1 A g<sup>-1</sup> and (b) 1 A g<sup>-1</sup>. The long term cycling stability of MXene at 1 A g<sup>-1</sup>.

It is noticed that the MXene delivered the specific capacities of about 45 mA h g<sup>-1</sup> under 0.1 A g<sup>-1</sup> current density. Considering the weight percent of the MXene (6.93%) in Co<sub>9</sub>S<sub>8</sub> NP@NPC@MXene, about 3 mA h g<sup>-1</sup> capacity was contributed by MXene, which is a negligible contribution to the Al ion storage.

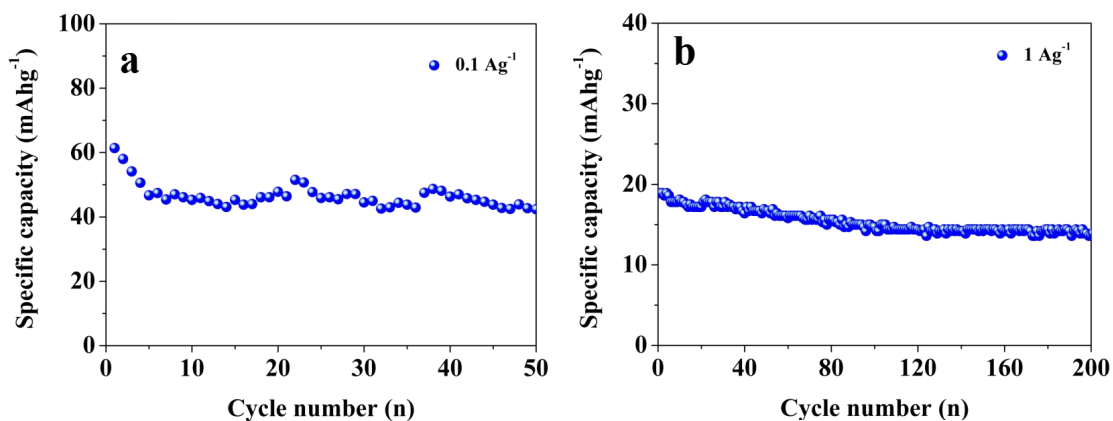

Fig. S13. (a) The cycle stability of ZIF-67 after high temperature treatment at 0.1 A g<sup>-1</sup> (a) and 1 A g<sup>-1</sup> (b).

It is noticed that the ZIF-67 after high-temperature treatment delivered the specific capacities of 60 mAh g<sup>-1</sup> under 100 mA g<sup>-1</sup> current density. Considering the weight percent of the carbon matrix (21.65%) in Co<sub>9</sub>S<sub>8</sub> NP@NPC@MXene, about 13 mAh g<sup>-1</sup> capacity was contributed by carbon, which is a negligible contribution to the Al ion storage. Therefore, the high capacity of the Co<sub>9</sub>S<sub>8</sub> NP@NPC@MXene relied on the Co<sub>9</sub>S<sub>8</sub> nanocrystals.

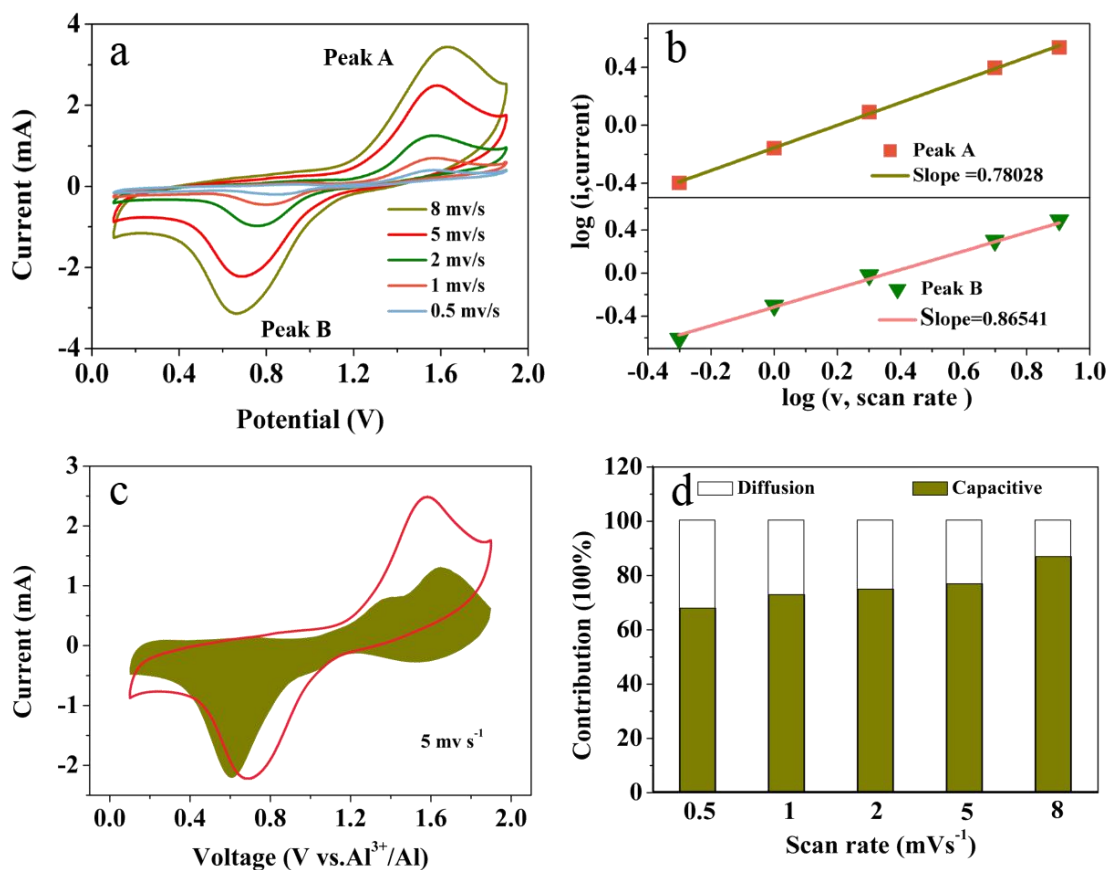

Fig. S14. CV curves from 0.5 to 8  $\text{mV s}^{-1}$  of  $\text{Co}_9\text{S}_8$  NP@NPC@MXene; (b) The  $\log(i)$  versus  $\log(v)$  plots at different CV peaks of  $\text{Co}_9\text{S}_8$  NP@NPC@MXene; (c) Calculated capacitive contributions at 5  $\text{mV s}^{-1}$  of  $\text{Co}_9\text{S}_8$  NP@NPC@MXene; (d) A summary of capacitive contributions at different scan rates of  $\text{Co}_9\text{S}_8$  NP@NPC@MXene.



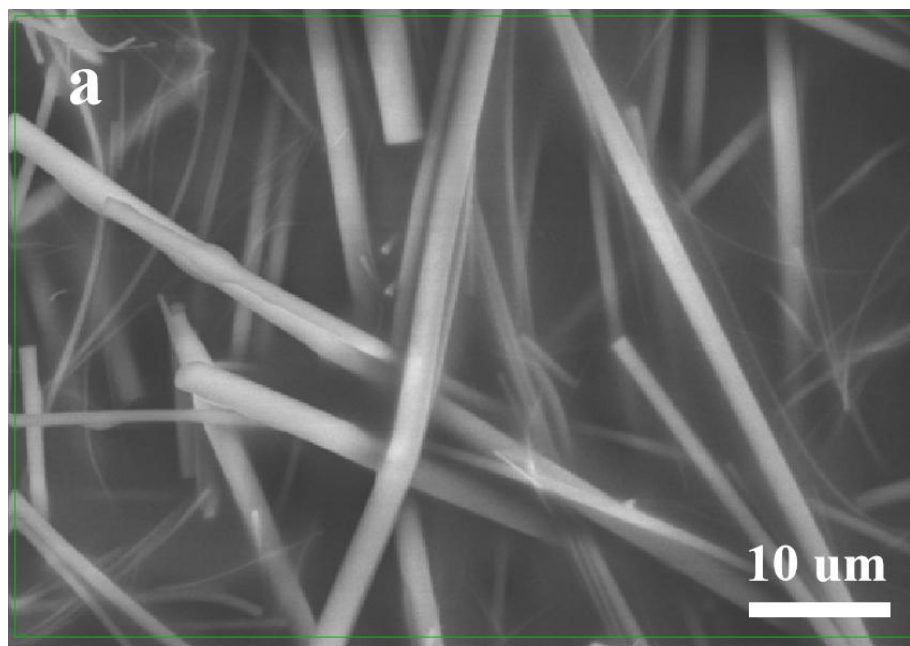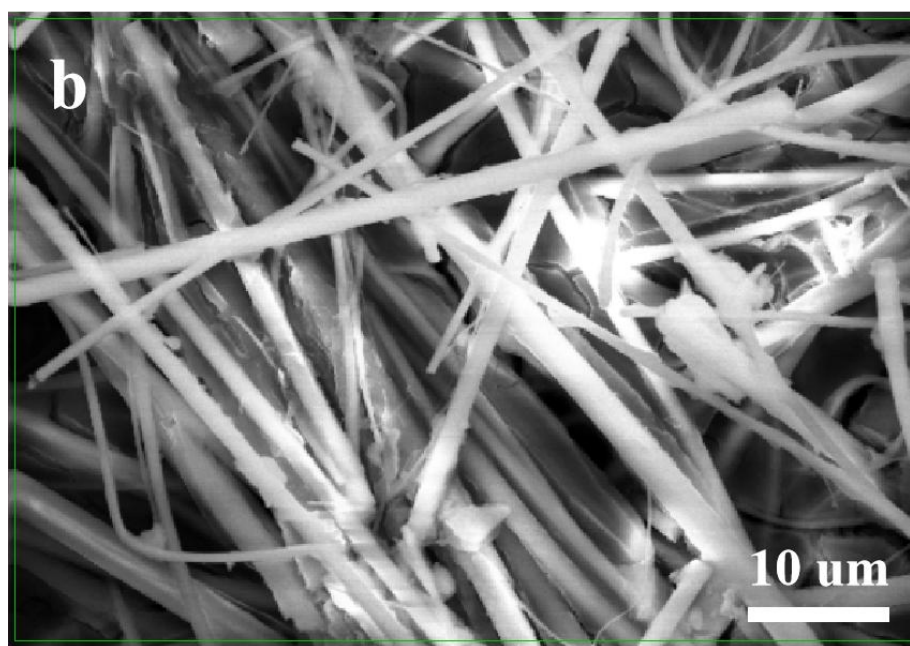

Fig. S15. The SEM images of the battery separator of the cell containing the (a)  $\text{Co}_9\text{S}_8\text{NP@NPC}$  cathode and (b)  $\text{Co}_9\text{S}_8\text{NP@NPC@MXene}$  cathode.

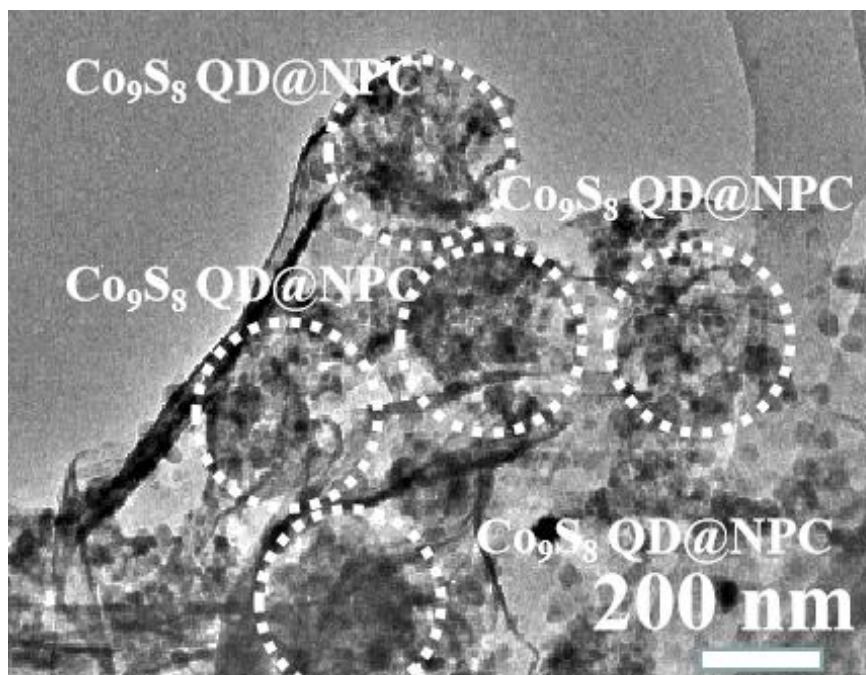

Fig. S16. The TEM image of Co<sub>9</sub>S<sub>8</sub> NP@NPC@MXene cathode after 100 cycles.

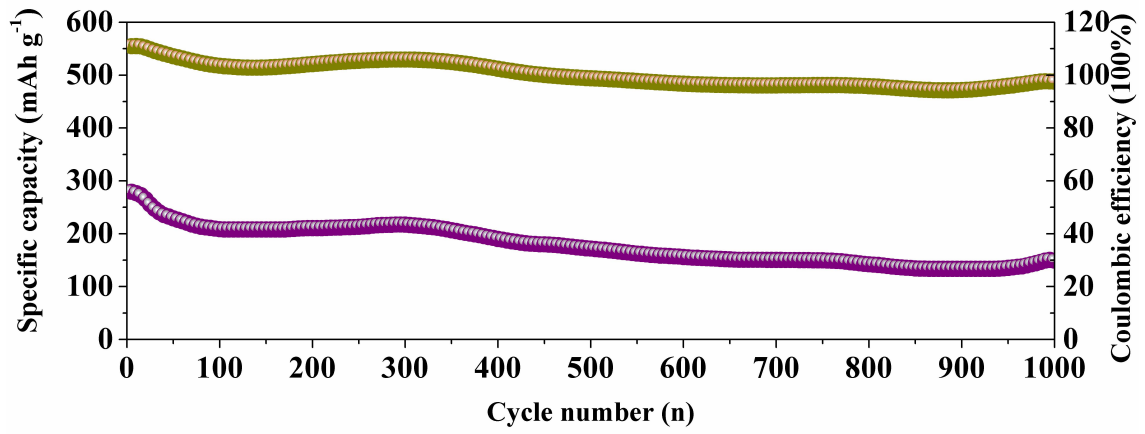

Fig. S17. The GCD curves of CoSe<sub>2</sub>@NPC@MXene of the cell at different current densities.

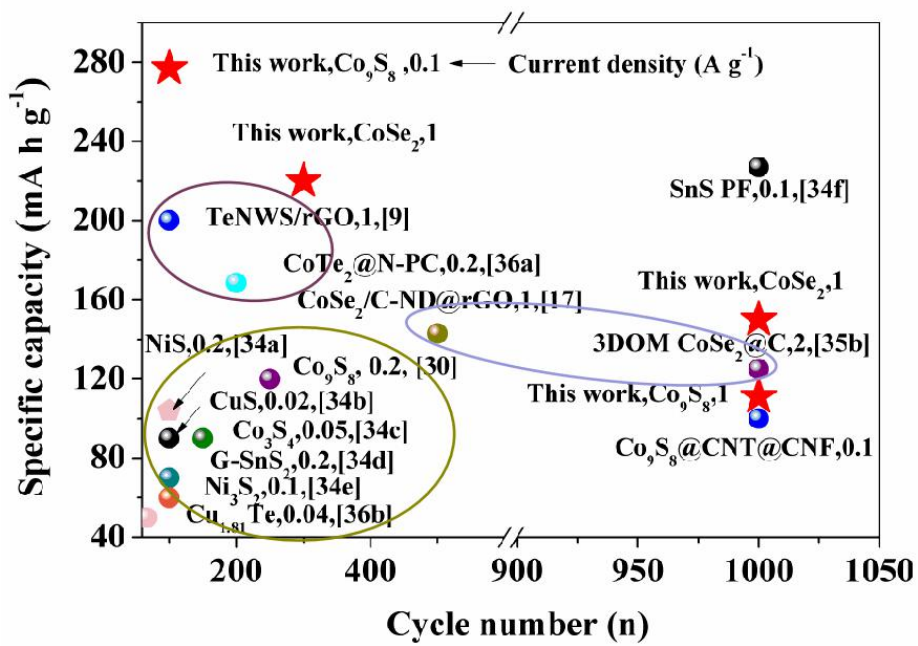

Fig. S18. Comparison of the performance of Co<sub>9</sub>S<sub>8</sub> NP@NPC@MXene and CoSe<sub>2</sub>@NPC@MXene electrode with most previously reported various types of RABs cathodes.

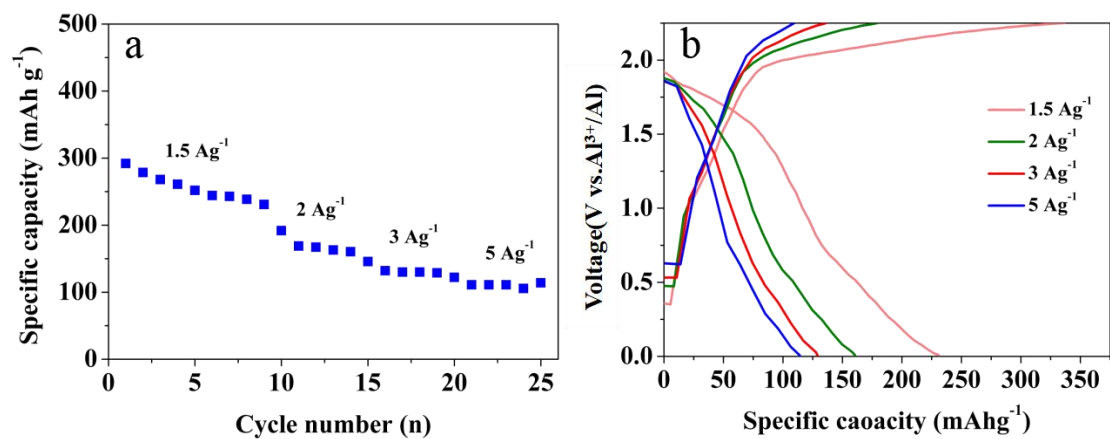

Fig. S19. The rate performance of CoSe<sub>2</sub>@NPC@MXene (a), the GCD curves of different current densities (b).

Table S1. Comparison of electrochemical performance with the other representative metal sulfide cathode.

| Sample                                  | Current density<br>(A g <sup>-1</sup> ) | Cycle number | Discharge<br>capacity<br>(mA h g <sup>-1</sup> ) | Ref.      |
|-----------------------------------------|-----------------------------------------|--------------|--------------------------------------------------|-----------|
| Porous Co <sub>9</sub> S <sub>8</sub>   | 0.2                                     | 250          | 120                                              | 2         |
| Co <sub>9</sub> S <sub>8</sub> @CNT-CNF | 1                                       | 6000         | 87                                               | 3         |
| Ni <sub>3</sub> S <sub>2</sub> @RGO     | 0.1                                     | 100          | 60                                               | 4         |
| CuS@C                                   | 0.02                                    | 100          | 90                                               | 5         |
| G-SnS <sub>2</sub>                      | 0.2                                     | 100          | 70                                               | 6         |
| TiS <sub>2</sub>                        | 0.005                                   | 20           | 65                                               | 7         |
| Co <sub>3</sub> S <sub>4</sub>          | 0.05                                    | 150          | 90                                               | 8         |
| VS <sub>2</sub>                         | 0.1                                     | 50           | 50                                               | 9         |
| MoS <sub>2</sub>                        | 0.04                                    | 100          | 66.7                                             | 10        |
| VS <sub>4</sub> @RGO                    | 0.1                                     | 100          | 80                                               | 11        |
| NiS                                     | 0.2                                     | 100          | 104                                              | 12        |
| Co <sub>9</sub> S <sub>8</sub> NP@NPC@  | 0.1                                     | 100          | 277                                              | This work |
| MXene                                   | 1                                       | 1000         | 110                                              |           |

|                   |   |      |     |
|-------------------|---|------|-----|
| CoSe <sub>2</sub> | 1 | 300  | 220 |
| @NPC@MXene        | 1 | 1000 | 150 |

---

## References:

- 1 Y. Guo, Z. Hu, J. Wang, Z. Peng, J. Zhu, H. Ji, L. Wan, *J. Angew. Chem. Int. Ed.*, 2020, 59, 22963-22967.
- 2 Z. Hu, K. Zhi, Q. Li, Z. Zhao, H. Liang, X. Liu, J. Huang, C. Zhang, H. Li, X. Guo, *J. Power Sources*, 2019, 440, 227147-227152.
- 3 Y. Hu, D. Ye, B. Luo, H. Hu, X. Zhu, S. Wang, L. Li, S. Peng, L. Wang, *Adv. Mater.*, 2018, 30, 1703824-1703829.
- 4 S. Wang, Z. Yu, J. Tu, J. Wang, D. Tian, Y. Liu, S. Jiao, *Adv. Energy Mater.*, 2016, 13, 1600137-1600146.
- 5 S. Wang, S. Jiao, J. Wang, H. S. Chen, D. Tian, H. Lei, D. N. Fang, *ACS Nano*, 2017, 11, 469-477.
- 6 Y. Hu, B. Luo, D. Ye, X. Zhu, M. Lyu, L. Wang, *Adv. Mater.* 2017, 29, 1606132-1606137.
- 7 L. Geng, J. P. Scheifers, C. Fu, J. Zhang, B. P. T. Fokwa, J. Guo, *Titanium ACS Appl. Mater. Interfaces* 2017, 9, 21251-21257.
- 8 H. Li, H. Yang, Z. Sun, Y. Shi, H. M. Cheng, F. Li, *Nano Energy* 2019, 56, 100-108.
- 9 L. Wu, R. Sun, F. Xiong, C. Pei, K. Han, C. Peng, Y. Fan, W. Yang, Q. An, L. Mai, *Phys. Chem. Chem. Phys.* 2018, 20, 22563-22568.
- 10 Z. Li, B. Niu, J. Liu, J. Li, F. Kang, *ACS Appl. Mater. Interfaces*, 2018, 10, 9451-9459.
- 11 X. Zhang, S. Wang, J. Tu, G. Zhang, S. Li, D. Tian, S. Jiao, *ChemSusChem*, 2018, 11, 709-715.
- 12 Z. Yu, Z. Kang, Z. Hu, J. Lu, Z. Zhou, S. Jiao, *Chem. Commun.* 2016, 52, 10427-10430.
- 13 X. Zhang, S. Jiao, J. Tu, W. L. Song, X. Xiao, S. Li, M. Wang, H. Lei, D. Tian, H. Chen, D. Fang, *Energy Environ. Sci.*, 2019, 12, 1918-1927.
- 14 B. Zhang, Y. Zhang, J. Li, J. Liu, X. Huo, F. Kang, *J. Mater. Chem. A*, 2020, 8, 5535-5545.
- 15 K. Liang, L. Ju, S. Koul, A. Kushima, Y. Yang, *Adv. Energy Mater.*, 2018, 9, 1802543-1802549.
- 16 T. Cai, L. Zhao, H. Hu, T. Li, X. Li, S. Guo, Y. Li, Q. Xue, W. Xing, Z. Yan, L. Wang, *Energy Environ. Sci.* 2018, 11, 2341-2347.
- 17 Y. Hu, D. Ye, B. Luo, H. Hu, X. Zhu, S. Wang, L. Li, S. Peng, L. Wang, *Adv. Mater.*, 2018, 30, 1703824-1703829.
- 18 S. Wang, S. Jiao, J. Wang, H. S. Chen, D. Tian, H. Lei, D. N. Fang, *ACS Nano*, 2017, 11, 469-477.
- 19 J. Wu, D. Wu, M. Zhao, Z. Wen, J. Jiang, J. Zeng, J. Zhao, *Dalton Trans.*, 49 2020, 49, 729-736.
